# Supplementary material
Source: publisher figshare collection journal article supplement (https://geolsoc.figshare.com/ndownloader/files/5424605)
Supplement: Supplementary file 1 [file 5424605]

Table 3.
Applied SIRM	Applied BIRM	RD15D
		M - SIRM (A/M)	M - BIRM (A/M)	M/Mo (SIRM)	M/Mo (BIRM)
0	0	0.5892283	12.77105	0.046137812	1
0.01	-0.01	0.5902068	8.872187	0.04621443	0.69471085
0.03	-0.02	4.98251	7.054828	0.390140983	0.552407829
0.05	-0.03	6.910615	2.158078	0.541115648	0.168982034
0.07	-0.04	8.737071	0.3796116	0.684130984	0.029724384
0.1	-0.05	10.44058		0.817519311
0.13	-0.06	11.55431		0.904726706
0.16	-0.08	12.1403		0.950610952
0.2		12.6105		0.987428598
0.25		12.96214		1.014962748
0.3		13.10138		1.025865532
0.4		13.37483		1.04727724
0.5		13.36373		1.046408087
0.7		13.31062		1.042249463
0.9		13.25752		1.038091621
1.25		13.10103		1.025838126
2		12.86297		1.007197529
2.5		12.77105		1
Applied SIRM	Applied BIRM	RD25L
		M - SIRM (A/M)	M - BIRM (A/M)	M/Mo (SIRM)	M/Mo (BIRM)
0	0	8.75E-02	0.9348161	0.093645296	1
0.01	-0.01	8.75E-02	0.915177	0.093619815	0.978991483
0.03	-0.02	0.2634198	0.62191	0.28178783	0.665275234
0.05	-0.03	0.4242287	0.3422835	0.453809792	0.366150626
0.07	-0.04	0.5550613	0.2205221	0.593765234	0.235898911
0.1	-0.05	0.6738857	8.43E-02	0.720875154	0.090177651
0.13	-0.06	0.7491201	3.04E-02	0.801355582	0.032515722
0.16	-0.08	0.8070458		0.86332039
0.2		0.8553976		0.915043718
0.25		0.8884965		0.950450575
0.3		0.9064161		0.969619693
0.4		0.9294402		0.994249243
0.5		0.9350097		1.0002071
0.7		0.9399846		1.005528895
0.9		0.9390267		1.004504201
1.25		0.9330364		0.998096203
2		0.9314779		0.99642903
2.5		0.9348161		1
Applied SIRM	Applied BIRM	RD32A
		M - SIRM (A/M)	M - BIRM (A/M)	M/Mo (SIRM)	M/Mo (BIRM)
0	0	0.8505298	15.58817	0.054562518	1
0.01	-0.01	0.8521045	10.18573	0.054663537	0.653426926
0.03	-0.02	5.594408	7.570594	0.358888054	0.485662781
0.05	-0.03	9.383587	2.30163	0.60196848	0.147652354
0.07	-0.04	11.57822	1.910053	0.742756847	0.122532215
0.1	-0.05	13.34845		0.856319247
0.13	-0.06	14.55848		0.933944138
0.16	-0.08	15.11683		0.969762968
0.2		15.73216		1.009237133
0.25		16.08314		1.031752925
0.3		16.24327		1.042025459
0.4		16.56351		1.062569243
0.5		16.47646		1.05698488
0.7		16.34199		1.048358467
0.9		16.24632		1.04222112
1.25		16.10532		1.033175799
2		15.85521		1.01713094
2.5		15.58817		1
Applied SIRM	Applied BIRM	RD99C
		M - SIRM (A/M)	M - BIRM (A/M)	M/Mo (SIRM)	M/Mo (BIRM)
0	0	1.368597	26.57386	0.051501626	1
0.01	-0.01	1.365434	26.37158	0.051382599	0.992388008
0.03	-0.02	5.135942	18.80878	0.193270454	0.707792545
0.05	-0.03	9.165282	11.11866	0.344898408	0.418405907
0.07	-0.04	14.08438	5.44989	0.530008813	0.205084621
0.1	-0.05	17.80821	1.738669	0.67014013	0.065427793
0.13	-0.06	20.9528	1.760843	0.788474087	0.066262222
0.16	-0.08	22.34592		0.840898537
0.2		24.05764		0.905312213
0.25		25.03378		0.942045303
0.3		25.65716		0.965503694
0.4		26.34654		0.991445729
0.5		26.55767		0.999390755
0.7		26.63851		1.002432842
0.9		26.66252		1.003336361
1.25		26.67696		1.003879753
2		26.58515		1.000424854
2.5		26.57386		1
Applied SIRM	Applied BIRM	RD108R
		M - SIRM (A/M)	M - BIRM (A/M)	M/Mo (SIRM)	M/Mo (BIRM)
0	0	0.9640554	19.75273	0.048806185	1
0.01	-0.01	0.9612164	14.97498	0.048662458	0.758122042
0.03	-0.02	5.919738	11.71315	0.299692144	0.592988918
0.05	-0.03	9.126193	5.71295	0.462021857	0.289223312
0.07	-0.04	11.87565	1.333197	0.601215629	0.067494316
0.1	-0.05	14.94205		0.756454931
0.13	-0.06	16.90316		0.855737916
0.16	-0.08	17.88261		0.905323467
0.2		18.95667		0.959698735
0.25		19.59546		0.992038063
0.3		19.86065		1.005463549
0.4		20.19134		1.022205032
0.5		20.59951		1.042869011
0.7		20.49512		1.037584172
0.9		20.2867		1.027032719
1.25		20.18415		1.021841032
2		19.92655		1.008799796
2.5		19.75273		1
Applied SIRM	Applied BIRM	RD122L
		M - SIRM (A/M)	M - BIRM (A/M)	M/Mo (SIRM)	M/Mo (BIRM)
0	0	0.7465929	10.73075	0.06957509	1
0.01	-0.01	0.7466874	10.48112	0.069583897	0.976736948
0.03	-0.02	2.18039	7.777268	0.20319083	0.724764625
0.05	-0.03	3.94184	4.554262	0.367340587	0.424412273
0.07	-0.04	5.830686	2.413193	0.543362393	0.224885772
0.1	-0.05	7.561197	0.7933354	0.70462894	0.07393103
0.13	-0.06	8.733396		0.813866319
0.16	-0.08	9.521555		0.887314959
0.2		10.17118		0.947853598
0.25		10.57138		0.985148289
0.3		10.71254		0.998303008
0.4		10.91999		1.0176353
0.5		10.92111		1.017739673
0.7		10.90267		1.016021247
0.9		10.89892		1.015671784
1.25		10.87315		1.013270275
2		10.78207		1.004782518
2.5		10.73075		1
